# Supplementary material
Source: HighWire-hosted journal article supplement (https://ijgc.bmj.com/content/29/6/1021)
Supplement: inline-supplementary-material-1 [file inline-supplementary-material-1.docx]

| Study | Clearly stated aim | Inclusion of consecutive patients | Prospective data collection | Endpoints appropriate to study aim | Unbiased assessment of study endpoint | <5% loss to follow-up | Prospective calculation of study size | Follow-up period appropriate to the aim of the study | Total score |
| --- | --- | --- | --- | --- | --- | --- | --- | --- | --- |
| Cioffi et al, 2018 | 2 | 0 | 0 | 2 | 2 | 2 | 0 | 2 | 10 |
| Wong et al, 2014 | 2 | 0 | 0 | 2 | 1 | 1 | 0 | 2 | 8 |
| Vargas et al, 2014 | 2 | 0 | 0 | 1 | 2 | 2 | 0 | 2 | 9 |
| Williams et al, 2013 | 2 | 0 | 0 | 1 | 2 | 2 | 0 | 2 | 9 |
| Braga et al, 2009 | 2 | 2 | 0 | 1 | 2 | 1 | 0 | 2 | 10 |
| Garrett et al, 2008 | 2 | 0 | 0 | 1 | 1 | 1 | 0 | 1 | 6 |
| Goto et al, 2004 | 2 | 0 | 0 | 2 | 2 | 2 | 0 | 2 | 10 |
| Khan et al, 2004 | 2 | 0 | 0 | 1 | 1 | 1 | 0 | 2 | 7 |
| Matsui et al, 2004 | 2 | 2 | 0 | 2 | 2 | 2 | 0 | 2 | 12 |
| Lok et al,  2003 | 2 | 0 | 0 | 2 | 2 | 1 | 0 | 2 | 9 |
| Garner et al, 2003 | 2 | 0 | 0 | 1 | 1 | 2 | 0 | 2 | 8 |
| Blagden et al, 2001 | 2 | 0 | 0 | 1 | 1 | 2 | 0 | 2 | 8 |
| Lan et al,  2001 | 2 | 0 | 0 | 1 | 1 | 2 | 0 | 2 | 8 |
| Amr et al,  1999 | 2 | 0 | 0 | 2 | 2 | 1 | 0 | 2 | 9 |
| Tuncer et al,  1998 | 2 | 0 | 0 | 2 | 2 | 1 | 0 | 2 | 9 |
| Newlands et al,  1998 | 2 | 2 | 0 | 1 | 1 | 2 | 0 | 2 | 10 |
| Kim et al,  1998 | 2 | 0 | 0 | 1 | 2 | 2 | 0 | 2 | 9 |
| Ayhan et al,  1990 | 2 | 0 | 0 | 1 | 1 | 2 | 0 | 2 | 8 |
| Song et al,  1988 | 2 | 0 | 0 | 2 | 2 | 2 | 0 | 2 | 10 |
| Rustin et al,  1988 | 2 | 0 | 0 | 1 | 2 | 1 | 0 | 2 | 8 |
| Ngan et al,  1988 | 2 | 0 | 0 | 1 | 2 | 2 | 0 | 1 | 8 |
| Berkowitz et al,  1987 | 2 | 0 | 0 | 1 | 2 | 2 | 0 | 2 | 9 |
| Adewole et al,  1986 | 2 | 0 | 0 | 2 | 2 | 1 | 0 | 2 | 9 |
| Ross et al,  1976 | 2 | 0 | 0 | 2 | 1 | 1 | 0 | 2 | 8 |
| Walden et al,  1976 | 2 | 0 | 0 | 1 | 2 | 2 | 0 | 2 | 9 |
| Van Thiel et al,  1972 | 2 | 0 | 0 | 1 | 1 | 2 | 0 | 2 | 8 |
